# Supplementary material for: Using logistic regression to improve the prognostic value of microarray gene expression data sets: application to early-stage squamous cell carcinoma of the lung and triple negative breast carcinoma
Source: PubMed Central journal article supplement (PMC4110620; doi:10.1186/1755-8794-7-33), 2014-06-10
Supplement: 1755-8794-7-33-S1.pdf [file 1755-8794-7-33-S1.pdf]

Table S1. Genes identified in the first sliding window analysis. A total of 99 genes were found. The accuracy count represents the number of windows in which each gene appeared.

| NUMBER | GENE NAME | ACCURACY COUNT |
|--------|-----------|----------------|
| 1      | ACSBG2    | 2              |
| 2      | ARFIP1    | 3              |
| 3      | ARHGAP25  | 1              |
| 4      | ARID5B    | 2              |
| 5      | C1S       | 5              |
| 6      | C2CD2L    | 5              |
| 7      | CC2D1A    | 1              |
| 8      | CCDC88C   | 7              |
| 9      | CCL2      | 3              |
| 10     | CD27      | 20             |
| 11     | CD79A     | 18             |
| 12     | CD83      | 1              |
| 13     | CHKA      | 4              |
| 14     | COL3A1    | 2              |
| 15     | CPA3      | 19             |
| 16     | CSTA      | 5              |
| 17     | CTTN      | 2              |
| 18     | CYBA      | 2              |
| 19     | DCN       | 12             |
| 20     | DDR2      | 2              |
| 21     | DEF6      | 8              |
| 22     | DTNB      | 9              |
| 23     | EGR2      | 2              |
| 24     | ENO2      | 4              |
| 25     | FAM46C    | 5              |
| 26     | FBLN1     | 1              |
| 27     | FBLN5     | 2              |
| 28     | FCRL2     | 4              |
| 29     | FKBP11    | 5              |
| 30     | FMO3      | 7              |
| 31     | GABRB2    | 1              |
| 32     | GAPDHS    | 1              |
| 33     | GM2A      | 14             |
| 34     | GUSBP11   | 8              |
| 35     | H2AFY2    | 1              |
| 36     | HLX       | 2              |
| 37     | HOXC8     | 1              |
| 38     | HSD17B6   | 1              |
| 39     | IGHD      | 9              |
| 40     | IGHG1     | 11             |
| 41     | IGHM      | 9              |
| 42     | IGJ       | 9              |
| 43     | IGKC      | 13             |
| 44     | IGKV4-1   | 9              |

Table S1. Genes identified in the first sliding window analysis. A total of 99 genes were found. The accuracy count represents the number of windows in which each gene appeared.

|    |          |    |
|----|----------|----|
| 45 | IGL@     | 4  |
| 46 | IGLJ3    | 11 |
| 47 | IGLL3P   | 9  |
| 48 | IGLV1-40 | 13 |
| 49 | IGLV3-19 | 10 |
| 50 | IGLV3-25 | 9  |
| 51 | INPPL1   | 8  |
| 52 | IRAK4    | 2  |
| 53 | ISG20    | 3  |
| 54 | ITGB7    | 6  |
| 55 | ITM2A    | 11 |
| 56 | KCTD3    | 1  |
| 57 | KIAA0125 | 11 |
| 58 | KIF4A    | 1  |
| 59 | LATS1    | 2  |
| 60 | LAX1     | 11 |
| 61 | LPPR1    | 1  |
| 62 | LRRC23   | 4  |
| 63 | METTL2B  | 1  |
| 64 | MFSD10   | 1  |
| 65 | MLF1IP   | 1  |
| 66 | MMP1     | 1  |
| 67 | MMP17    | 3  |
| 68 | MS4A1    | 1  |
| 69 | MXI1     | 2  |
| 70 | MZB1     | 9  |
| 71 | NELL2    | 2  |
| 72 | NEUROG1  | 3  |
| 73 | OAZ3     | 1  |
| 74 | PARM1    | 1  |
| 75 | PDGFRL   | 5  |
| 76 | PDZRN3   | 2  |
| 77 | PECAM1   | 4  |
| 78 | PIM2     | 9  |
| 79 | PLA2G10  | 1  |
| 80 | PLEKHB1  | 1  |
| 81 | PNOC     | 5  |
| 82 | POSTN    | 1  |
| 83 | POU2AF1  | 11 |
| 84 | PRDM1    | 6  |
| 85 | PRNP     | 1  |
| 86 | PTPLAD1  | 1  |
| 87 | PTX3     | 1  |
| 88 | RHOH     | 4  |
| 89 | SLC19A1  | 2  |

Table S1. Genes identified in the first sliding window analysis. A total of 99 genes were found. The accuracy count represents the number of windows in which each gene appeared.

|    |          |    |
|----|----------|----|
| 90 | SLC35A3  | 1  |
| 91 | SNUPN    | 2  |
| 92 | SOX14    | 1  |
| 93 | SPAG6    | 5  |
| 94 | ST3GAL4  | 4  |
| 95 | TNFRSF17 | 11 |
| 96 | VEGFA    | 1  |
| 97 | VPREB3   | 12 |
| 98 | WNT2     | 3  |
| 99 | YBX2     | 5  |
