# Supplementary material for: Using logistic regression to improve the prognostic value of microarray gene expression data sets: application to early-stage squamous cell carcinoma of the lung and triple negative breast carcinoma
Source: PubMed Central journal article supplement (PMC4110620; doi:10.1186/1755-8794-7-33), 2014-06-10
Supplement: 1755-8794-7-33-S2.pdf [file 1755-8794-7-33-S2.pdf]

Table S2. The 24 prognostic genes emerging from the logistic regression analysis of 80 revolving sliding windows.

| GENE SYMBOL | GENE NAME                                             | CHI-SQUARED PROBABILITIES <sup>1</sup> |         | CELL OR TISSUE ORIGIN            | RELATIVE EXPRESSION IN LONGEST SURVIVORS <sup>2</sup> | IMMUNE OR NEOPLASTIC (ITALICS) FUNCTIONS                       |
|-------------|-------------------------------------------------------|----------------------------------------|---------|----------------------------------|-------------------------------------------------------|----------------------------------------------------------------|
|             |                                                       | LOW                                    | HIGH    |                                  |                                                       |                                                                |
| CD79A       | CD79a molecule, immunoglobulin-associated alpha       | 2.1e-08                                | 6.1e-07 | B cells, lymphoid cells.         | ↑                                                     | B-cell antigen receptor complex.                               |
| CD27        | CD27 molecule                                         | 8.0e-07                                | 2.6e-05 | T cells.                         | ↑                                                     | TNF superfamily receptor for CD70/CD27L.                       |
| IGLV3-19    | Immunoglobulin lambda variable 3-19                   | 1.5e-08                                | 1.4e-06 | B cells                          | ↑                                                     | Ig lambda variable light chain.                                |
| IGLV1-40    | Immunoglobulin lambda variable 1-40                   | 1.0e-06                                | 2.8e-05 | B cells                          | ↑                                                     | Ig lambda variable light chain.                                |
| IGLJ3       | Immunoglobulin joining lambda 3                       | 7.2e-08                                | 2.4e-06 | B cells                          | ↑                                                     | Ig lambda joining light chain.                                 |
| GM2A        | GM2 ganglioside activator                             | 3.1e-05                                | 4.5e-04 | Epithelial cells                 | ↑                                                     | <i>Endosomal glycolipid transport and degradation protein.</i> |
| CPA3        | Carboxypeptidase A3 (mast cell)                       | 9.5e-08                                | 2.3e-06 | Mast cells, other tissues.       | ↑                                                     | Metalloexopeptidase complexes in secretory granules.           |
| VPREB3      | Pre-B lymphocyte 3                                    | 3.4e-06                                | 7.9e-04 | B-cell precursors.               | ↑                                                     | Biosynthesis of pre-B cell receptors.                          |
| IGHD        | Immunoglobulin heavy constant delta                   | 6.3e-07                                | 9.4e-06 | B cells.                         | ↑                                                     | Heavy chain of IgD, B cell membranes.                          |
| TNFRSF17    | Tumor necrosis factor receptor superfamily, member 17 | 2.3e-07                                | 1.7e-06 | Mature B cells.                  | ↑                                                     | B cell receptor for TNFSF13B.                                  |
| IGHG1       | Immunoglobulin heavy constant gamma (G1m Marker)      | 6.3e-07                                | 7.8e-06 | B cells, carcinoma cells.        | ↑                                                     | Circulating immunoglobulins.                                   |
| POU2AF1     | POU class 2 associating factor 1                      | 4.5e-06                                | 4.6e-05 | B cells; lung, various tissues,  | ↑                                                     | Transcriptional coactivator of OCT1 and OCT2.                  |
| IGKC        | Immunoglobulin kappa constant                         | 1.4e-06                                | 1.3e-05 | B cells.                         | ↑                                                     | Constant domain of Ig kappa <u>light chain</u> .               |
| IGLL3P      | Immunoglobulin lambda-like polypeptide 3, pseudogene  | 3.9e-07                                | 3.1e-06 | N.A.                             | ↑                                                     | Pseudogene.                                                    |
| MZB1        | Marginal zone B and B1 cell-specific protein          | 9.5e-08                                | 2.3e-06 | Lymphoid tissues.                | ↑                                                     | Promotes IgM assembly and secretion.                           |
| DTNB        | Dystrobrevin, beta                                    | 2.0e-05                                | 3.6e-04 | Muscle, kidney, pancreas, brain. | ↑                                                     | None identified.                                               |

|          |                                                   |         |         |                               |   |                                                                           |
|----------|---------------------------------------------------|---------|---------|-------------------------------|---|---------------------------------------------------------------------------|
| LAX1     | Lymphocyte transmembrane adaptor 1                | 5.1e-06 | 5.1e-05 | T and B cells.                | ↑ | Negatively regulates T and B cell antigen receptor-mediated signaling.    |
| IGLV3-25 | Immunoglobulin lambda variable 3-25               | 2.5e-06 | 3.9e-05 | B cells.                      | ↑ | Immunoglobulin light chains.                                              |
| IGKV4-1  | Immunoglobulin kappa variable 4-1                 | 4.7e-06 | 3.2e-05 | B cells.                      | ↑ | Light chain of the B cell receptor; secreted by B cells.                  |
| ITM2A    | Integral membrane protein 2A                      | 2.7e-05 | 3.5e-04 | T cells, various tissues.     | ↑ | None identified                                                           |
| PIM2     | Pim-2 oncogene                                    | 3.8e-06 | 9.4e-05 | Various tissues; neoplasms.   | ↑ | <i>Oncogene.</i>                                                          |
| MXI1     | MAX interactor 1, dimerization protein            | 7.8e-05 | 2.0e-03 |                               | ↓ | <i>Putative tumor suppressor which negatively regulates MYC function.</i> |
| IGHM     | Immunoglobulin heavy constant mu                  | 1.7e-05 | 1.3e-04 | B Cells.                      | ↑ | B cell antigen receptor complex; Igs.                                     |
| INPPL1   | Inositol polyphosphate phosphatase-like protein 1 | 7.9e-05 | 8.2e-04 | Macrophages, various tissues. | ↓ | Negative regulator of the immune system.                                  |

<sup>1</sup>The Chi-squared probabilities were calculated by ANOVA for all 24 logistic regression gene models. <sup>2</sup>The arrows indicate the relative expression levels in the long survivors group when compared to the levels in the early death group.
