# Supplementary material for: Using logistic regression to improve the prognostic value of microarray gene expression data sets: application to early-stage squamous cell carcinoma of the lung and triple negative breast carcinoma
Source: PubMed Central journal article supplement (PMC4110620; doi:10.1186/1755-8794-7-33), 2014-06-10
Supplement: 1755-8794-7-33-S3.pdf [file 1755-8794-7-33-S3.pdf]

Table S3. The entire list of consensus prognostic genes identified by the revolving sliding window approach.

| NUMBER | GENE NAME | ACCURACY COUNT |
|--------|-----------|----------------|
| 1      | LSP1      | 2              |
| 2      | ACSBG2    | 3              |
| 3      | POSTN     | 3              |
| 4      | MMP1      | 3              |
| 5      | HOXC8     | 3              |
| 6      | COL3A1    | 4              |
| 7      | PDZRN3    | 5              |
| 8      | WNT2      | 5              |
| 9      | CEND1     | 5              |
| 10     | FCRL2     | 6              |
| 11     | SLC19A1   | 6              |
| 12     | PDGFRL    | 6              |
| 13     | KCTD3     | 6              |
| 14     | SNUPN     | 7              |
| 15     | PNOC      | 7              |
| 16     | ISG20     | 8              |
| 17     | C1S       | 9              |
| 18     | NEUROG1   | 10             |
| 19     | YBX2      | 11             |
| 20     | CCL2      | 11             |
| 21     | CSTA      | 12             |
| 22     | ITGB7     | 12             |
| 23     | PRDM1     | 12             |
| 24     | FAM46C    | 12             |
| 25     | CCDC88C   | 13             |
| 26     | FMO3      | 14             |
| 27     | CD83      | 14             |
| 28     | METTL2B   | 14             |
| 29     | IGL@      | 14             |
| 30     | KIAA0125  | 16             |
| 31     | C2CD2L    | 16             |
| 32     | IGJ       | 17             |
| 33     | RHOH      | 18             |
| 34     | GUSBP11   | 19             |
| 35     | DCN       | 19             |
| 36     | INPPL1    | 22             |
| 37     | IGHM      | 23             |
| 38     | MXI1      | 23             |
| 39     | PIM2      | 24             |
| 40     | ITM2A     | 25             |
| 41     | IGKV4-1   | 25             |
| 42     | IGLV3-25  | 26             |
| 43     | LAX1      | 26             |
| 44     | DTNB      | 28             |

Table S3. The entire list of consensus prognostic genes identified by the revolving sliding window approach.

|    |          |    |
|----|----------|----|
| 45 | MZB1     | 29 |
| 46 | IGLL3P   | 30 |
| 47 | IGKC     | 31 |
| 48 | POU2AF1  | 33 |
| 49 | IGHG1    | 34 |
| 50 | TNFRSF17 | 34 |
| 51 | IGHD     | 34 |
| 52 | VPREB3   | 34 |
| 53 | CPA3     | 36 |
| 54 | GM2A     | 38 |
| 55 | IGLJ3    | 40 |
| 56 | IGLV1-40 | 41 |
| 57 | IGLV3-19 | 42 |
| 58 | CD27     | 47 |
| 59 | CD79A    | 48 |
