# Supplementary material for: Using logistic regression to improve the prognostic value of microarray gene expression data sets: application to early-stage squamous cell carcinoma of the lung and triple negative breast carcinoma
Source: PubMed Central journal article supplement (PMC4110620; doi:10.1186/1755-8794-7-33), 2014-06-10
Supplement: 1755-8794-7-33-S4.pdf [file 1755-8794-7-33-S4.pdf]

Table S4. Correlation coefficients of CD79A versus the remaining 23 prognostic genes.

| <u>GENE NAME</u> | <u>CORRELATION WITH CD79A</u> |
|------------------|-------------------------------|
| IPLL3P           | 0.88                          |
| LAX1             | 0.87                          |
| IPLJ3            | 0.87                          |
| IPLM             | 0.85                          |
| MZB1             | 0.85                          |
| IPLK             | 0.85                          |
| PIM2             | 0.83                          |
| IPLV3-25         | 0.82                          |
| IPLV1-40         | 0.82                          |
| POU2AF1          | 0.80                          |
| CD27             | 0.78                          |
| TNFRSF17         | 0.78                          |
| IPLG1            | 0.77                          |
| IPLD             | 0.77                          |
| IPLV3-19         | 0.77                          |
| IPLV4-1          | 0.75                          |
| DTNB             | 0.66                          |
| ITM2A            | 0.47                          |
| CPA3             | 0.46                          |
| VPREB3           | 0.34                          |
| GM2A             | 0.25                          |
| INPPL1           | -0.059                        |
| MXI1             | -0.26                         |
