# Supplementary material for: Using logistic regression to improve the prognostic value of microarray gene expression data sets: application to early-stage squamous cell carcinoma of the lung and triple negative breast carcinoma
Source: PubMed Central journal article supplement (PMC4110620; doi:10.1186/1755-8794-7-33), 2014-06-10
Supplement: 1755-8794-7-33-S5.pdf [file 1755-8794-7-33-S5.pdf]

Table S5. Forty genes identified by KM analysis of stage I and II cases from the GDS2373 data set.

IGLJ3  
CYP20A1  
IGKC  
MPI  
IGHD  
GM2A  
TNFRSF25  
CDC25C  
DTNB  
SYNE1  
GABRR1  
EVL  
IGKV4-1  
TNFRSF17  
RUNX3  
ALDH7A1  
CD79A  
CHKA  
POU2AF1  
CD27  
TSPO  
MZB1  
PPAP2A  
INPPL1  
KRT7  
CPA3  
CCDC87  
TBC1D16  
UPP1  
OXCT1  
GLRA2  
LGALS3BP  
HLA-DOB  
HSD17B6  
ELAC1  
PFKP  
LRBA  
IGLL3P  
AKTIP  
CCDC88C
