# Supplementary material for: Using logistic regression to improve the prognostic value of microarray gene expression data sets: application to early-stage squamous cell carcinoma of the lung and triple negative breast carcinoma
Source: PubMed Central journal article supplement (PMC4110620; doi:10.1186/1755-8794-7-33), 2014-06-10
Supplement: 1755-8794-7-33-S6.pdf [file 1755-8794-7-33-S6.pdf]

Table S6. A list of 63 Affymetrix HGU133A CEL files used for the TNB study.

|               |               |
|---------------|---------------|
| GSM79306.CEL  | GSM282427.CEL |
| GSM79336.CEL  | GSM282457.CEL |
| GSM120702.CEL | GSM282474.CEL |
| GSM177909.CEL | GSM282493.CEL |
| GSM36949.CEL  | GSM282528.CEL |
| GSM79329.CEL  | GSM177897.CEL |
| GSM120668.CEL | GSM177913.CEL |
| GSM65839.CEL  | GSM178021.CEL |
| GSM36927.CEL  | GSM178023.CEL |
| GSM282454.CEL | GSM178065.CEL |
| GSM282551.CEL | GSM178078.CEL |
| GSM65878.CEL  | GSM177980.CEL |
| GSM36797.CEL  | GSM177985.CEL |
| GSM120687.CEL | GSM178016.CEL |
| GSM178009.CEL | GSM178034.CEL |
| GSM177993.CEL |               |
| GSM120655.CEL |               |
| GSM282569.CEL |               |
| GSM36952.CEL  |               |
| GSM177999.CEL |               |
| GSM178079.CEL |               |
| GSM36835.CEL  |               |
| GSM177935.CEL |               |
| GSM282398.CEL |               |
| GSM177899.CEL |               |
| GSM37002.CEL  |               |
| GSM36905.CEL  |               |
| GSM282413.CEL |               |
| GSM177956.CEL |               |
| GSM37050.CEL  |               |
| GSM37051.CEL  |               |
| GSM782528.CEL |               |
| GSM79115.CEL  |               |
| GSM79145.CEL  |               |
| GSM79165.CEL  |               |
| GSM79280.CEL  |               |
| GSM79356.CEL  |               |
| GSM65842.CEL  |               |
| GSM65845.CEL  |               |
| GSM36855.CEL  |               |
| GSM36876.CEL  |               |
| GSM36961.CEL  |               |
| GSM36977.CEL  |               |
| GSM120649.CEL |               |
| GSM120658.CEL |               |
| GSM120683.CEL |               |
| GSM120684.CEL |               |
| GSM120696.CEL |               |
