# Supplementary material for: Using logistic regression to improve the prognostic value of microarray gene expression data sets: application to early-stage squamous cell carcinoma of the lung and triple negative breast carcinoma
Source: PubMed Central journal article supplement (PMC4110620; doi:10.1186/1755-8794-7-33), 2014-06-10
Supplement: 1755-8794-7-33-S7.pdf [file 1755-8794-7-33-S7.pdf]

**Table S7. TNB logistic regression analysis: AUC, 203 immune-related genes.**

| NUMBER | IMMUNE GENE | AUC    |
|--------|-------------|--------|
| 1      | AIRE        | 0.5225 |
| 2      | ALK         | 0.675  |
| 3      | BANK1       | 0.8575 |
| 4      | BCAP29      | 0.5625 |
| 5      | BCAP31      | 0.7    |
| 6      | BCL10       | 0.495  |
| 7      | BCL11A      | 0.4575 |
| 8      | BCL11B      | 0.5975 |
| 9      | BCL2        | 0.3775 |
| 10     | BCL3        | 0.56   |
| 11     | BCL6        | 0.505  |
| 12     | BCL7A       | 0.6725 |
| 13     | BCL7B       | 0.5225 |
| 14     | BCL7C       | 0.53   |
| 15     | BCL9        | 0.6525 |
| 16     | BLK         | 0.4775 |
| 17     | BLNK        | 0.8    |
| 18     | BTG1        | 0.6725 |
| 19     | BTG4        | 0.6375 |
| 20     | CD27        | 0.76   |
| 21     | CD79A       | 0.7275 |
| 22     | CD79B       | 0.7325 |
| 23     | CPA3        | 0.45   |
| 24     | CTAGE1      | 0.72   |
| 25     | CTLA4       | 0.53   |
| 26     | DLEU1       | 0.6875 |
| 27     | DLEU2       | 0.545  |
| 28     | DTNB        | 0.6825 |
| 29     | EBF2        | 0.5525 |
| 30     | EPAG        | 0.59   |
| 31     | FRAT1       | 0.5225 |
| 32     | FRAT2       | 0.505  |
| 33     | GM2A        | 0.6575 |
| 34     | GZMA        | 0.7325 |
| 35     | GZMB        | 0.6875 |
| 36     | GZMM        | 0.6475 |
| 37     | HELLS       | 0.5475 |
| 38     | HIVP1       | 0.5675 |
| 39     | HIVP2       | 0.5775 |
| 40     | HIVP3       | 0.575  |
| 41     | ICOS        | 0.735  |
| 42     | ICOSLG      | 0.55   |
| 43     | IGBP1       | 0.5775 |
| 44     | IGHD        | 0.7575 |
| 45     | IGHG1       | 0.605  |
| 46     | IGHM        | 0.6925 |
| 47     | IGHMBP2     | 0.705  |
| 48     | IGHV3-48    | 0.76   |

|    |          |        |
|----|----------|--------|
| 49 | IGHV5-78 | 0.69   |
| 50 | IGJ      | 0.6775 |
| 51 | IGK@     | 0.74   |
| 52 | IGKC     | 0.735  |
| 53 | IGLC1    | 0.685  |
| 54 | IGLJ3    | 0.725  |
| 55 | IPLL1    | 0.585  |
| 56 | IPLL3P   | 0.6675 |
| 57 | IPLL5    | 0.765  |
| 58 | IGLV1-44 | 0.7825 |
| 59 | IGLV6-57 | 0.72   |
| 60 | IGSF1    | 0.6275 |
| 61 | IGSF3    | 0.63   |
| 62 | IGSF6    | 0.655  |
| 63 | IGSF9B   | 0.5375 |
| 64 | IKBKAP   | 0.495  |
| 65 | IKBKB    | 0.5275 |
| 66 | IKBKE    | 0.53   |
| 67 | IKBKG    | 0.6025 |
| 68 | IL12A    | 0.57   |
| 69 | IL12B    | 0.7025 |
| 70 | INPPL1   | 0.615  |
| 71 | IRGC     | 0.5875 |
| 72 | IRGQ     | 0.62   |
| 73 | ISLR     | 0.64   |
| 74 | ITGAE    | 0.5475 |
| 75 | ITGAL    | 0.7875 |
| 76 | ITK      | 0.675  |
| 77 | ITM2A    | 0.785  |
| 78 | KIR2DL2  | 0.6575 |
| 79 | KIR2DL3  | 0.66   |
| 80 | KIR2DL4  | 0.625  |
| 81 | KIR2DS1  | 0.685  |
| 82 | KIR2DS3  | 0.7625 |
| 83 | KIR2DS5  | 0.58   |
| 84 | KIR3DL1  | 0.6875 |
| 85 | KIR3DL3  | 0.635  |
| 86 | KIR3DX1  | 0.7025 |
| 87 | LAG3     | 0.5675 |
| 88 | LAIR1    | 0.61   |
| 89 | LAIR2    | 0.545  |
| 90 | LAX1     | 0.75   |
| 91 | LCK      | 0.745  |
| 92 | LCP1     | 0.7425 |
| 93 | LCP2     | 0.755  |
| 94 | LEF1     | 0.5275 |
| 95 | LILRA1   | 0.5775 |
| 96 | LILRA2   | 0.4575 |
| 97 | LILRA3   | 0.6425 |

**Table S7. TNB logistic regression analysis: 203 immune related genes with an AUC of > 0.65.**

|     |          |        |
|-----|----------|--------|
| 98  | LILRA4   | 0.755  |
| 99  | LILRA5   | 0.55   |
| 100 | LILRA6   | 0.565  |
| 101 | LILRB1   | 0.67   |
| 102 | LILRB2   | 0.65   |
| 103 | LILRB4   | 0.725  |
| 104 | LILRB5   | 0.55   |
| 105 | LILRP2   | 0.66   |
| 106 | LRIG1    | 0.5475 |
| 107 | LRIG2    | 0.595  |
| 108 | LRIT1    | 0.53   |
| 109 | LRMP     | 0.6325 |
| 110 | LSP1     | 0.665  |
| 111 | LTA      | 0.6225 |
| 112 | LTB      | 0.8075 |
| 113 | LTBR     | 0.5875 |
| 114 | LY6D     | 0.54   |
| 115 | LY6E     | 0.6075 |
| 116 | LY6G5C   | 0.5775 |
| 117 | LY6G6C   | 0.75   |
| 118 | LY6G6D   | 0.59   |
| 119 | LY6G6E   | 0.5575 |
| 120 | LY6H     | 0.5225 |
| 121 | LY75     | 0.565  |
| 122 | LY86     | 0.755  |
| 123 | LY9      | 0.695  |
| 124 | LY96     | 0.6575 |
| 125 | LYL1     | 0.7275 |
| 126 | LYVE1    | 0.7775 |
| 127 | MAL      | 0.505  |
| 128 | MALL     | 0.625  |
| 129 | MALT1    | 0.5825 |
| 130 | MILR1    | 0.715  |
| 131 | MLL      | 0.5525 |
| 132 | MLL2     | 0.725  |
| 133 | MLL4     | 0.5625 |
| 134 | MLLT1    | 0.695  |
| 135 | MLLT10   | 0.635  |
| 136 | MLLT10P1 | 0.585  |
| 137 | MLLT11   | 0.59   |
| 138 | MLLT3    | 0.645  |
| 139 | MLLT4    | 0.69   |
| 140 | MXI1     | 0.52   |
| 141 | MZB1     | 0.73   |
| 142 | NFAT5    | 0.54   |
| 143 | NFATC1   | 0.535  |
| 144 | NFATC2IP | 0.56   |
| 145 | NFATC3   | 0.6375 |
| 146 | NFATC4   | 0.68   |

|     |         |        |
|-----|---------|--------|
| 147 | NFKB1   | 0.5225 |
| 148 | NFKB2   | 0.7875 |
| 149 | NFKBIA  | 0.6175 |
| 150 | NFKBIB  | 0.6275 |
| 151 | NFKBIE  | 0.705  |
| 152 | NFKBIL1 | 0.5475 |
| 153 | PBX1    | 0.5025 |
| 154 | PBX2    | 0.5475 |
| 155 | PBX3    | 0.4625 |
| 156 | PBXIP1  | 0.5225 |
| 157 | PIBF1   | 0.6325 |
| 158 | PIGR    | 0.5725 |
| 159 | PILRA   | 0.6525 |
| 160 | PILRB   | 0.5875 |
| 161 | PIM2    | 0.765  |
| 162 | POU2AF1 | 0.695  |
| 163 | PTCRA   | 0.5225 |
| 164 | PTPN22  | 0.72   |
| 165 | PVRIG   | 0.68   |
| 166 | RBPJ    | 0.5475 |
| 167 | RBPJL   | 0.65   |
| 168 | SEMA3A  | 0.535  |
| 169 | SEMA3B  | 0.5825 |
| 170 | SEMA3C  | 0.56   |
| 171 | SEMA3D  | 0.6025 |
| 172 | SEMA3E  | 0.555  |
| 173 | SEMA3F  | 0.5425 |
| 174 | SEMA3G  | 0.56   |
| 175 | SEMA4A  | 0.5325 |
| 176 | SEMA4C  | 0.695  |
| 177 | SEMA4D  | 0.675  |
| 178 | SEMA4F  | 0.67   |
| 179 | SEMA4G  | 0.6425 |
| 180 | SIGIRR  | 0.4875 |
| 181 | SLAMF1  | 0.6725 |
| 182 | SWAP70  | 0.5525 |
| 183 | TAL1    | 0.6425 |
| 184 | TAX1BP1 | 0.5825 |
| 185 | TCF7    | 0.505  |
| 186 | TCF7L1  | 0.6625 |
| 187 | TCF7L2  | 0.5825 |
| 188 | TCIRG1  | 0.515  |
| 189 | TCL1A   | 0.745  |
| 190 | TCL1B   | 0.525  |
| 191 | TCL6    | 0.4925 |
| 192 | TCTA    | 0.5075 |
| 193 | TIAM1   | 0.6225 |
| 194 | TIAM2   | 0.69   |
| 195 | TIE1    | 0.4925 |

**Table S7. TNB logistic regression analysis: 203 immune related genes with an AUC of > 0.65.**

|     |          |        |
|-----|----------|--------|
| 196 | TLX1     | 0.6025 |
| 197 | TLX2     | 0.77   |
| 198 | TLX3     | 0.665  |
| 199 | TNFRSF17 | 0.725  |
| 200 | VPREB1   | 0.6975 |
| 201 | VPREB3   | 0.7475 |
| 202 | VSIG10   | 0.5275 |
| 203 | VSIG4    | 0.56   |
