# Supplementary material for: Using logistic regression to improve the prognostic value of microarray gene expression data sets: application to early-stage squamous cell carcinoma of the lung and triple negative breast carcinoma
Source: PubMed Central journal article supplement (PMC4110620; doi:10.1186/1755-8794-7-33), 2014-06-10
Supplement: 1755-8794-7-33-S8.pdf [file 1755-8794-7-33-S8.pdf]

Table S8. TNB logistic regression analysis: 3 apparently non-immune related genes that have an AUC > 0.8, the best AUC score obtained with an immune gene.

|           | Gene    | Description                                                       | AUC    |
|-----------|---------|-------------------------------------------------------------------|--------|
| 204960_at | PTPRCAP | protein tyrosine phosphatase, receptor type, C-associated protein | 0.8725 |
| 214269_at | MFSD7   | major facilitator superfamily domain containing 7                 | 0.8625 |
| 220345_at | LRRTM4  | leucine rich repeat transmembrane neuronal 4                      | 0.885  |
