# Supplementary material for: Using logistic regression to improve the prognostic value of microarray gene expression data sets: application to early-stage squamous cell carcinoma of the lung and triple negative breast carcinoma
Source: PubMed Central journal article supplement (PMC4110620; doi:10.1186/1755-8794-7-33), 2014-06-10
Supplement: 1755-8794-7-33-S9.pdf [file 1755-8794-7-33-S9.pdf]

Table S9. TNB logistic regression analysis: immune genes that are closely correlated with gene IGLV1-44 in the initial TNB data analysis; also given are the AUC values for each of the genes.

| GENE     | AUC  | CORRELATION WITH<br>IGLV1-44 |
|----------|------|------------------------------|
| SEL1L    | 0.61 | 0.71                         |
| DNAJB9   | 0.63 | 0.71                         |
| SKAP2    | 0.81 | 0.66                         |
| KIAA0125 | 0.68 | 0.69                         |
| CLN3     | 0.72 | 0.67                         |
| IGHM     | 0.69 | 0.88                         |
| GM2A     | 0.66 | 0.67                         |
| IGHG1    | 0.61 | 0.76                         |
| IGLJ3    | 0.73 | 0.89                         |
| GUSBP11  | 0.63 | 0.79                         |
| IGKC     | 0.74 | 0.84                         |
| IGLC1    | 0.69 | 0.71                         |
| IGLV1-44 | 0.78 | 1.00                         |
| UBE2J1   | 0.70 | 0.65                         |
| FKBP11   | 0.61 | 0.69                         |
| GADD45A  | 0.72 | 0.65                         |
| PIM2     | 0.77 | 0.71                         |
| CD79A    | 0.73 | 0.79                         |
| POU2AF1  | 0.70 | 0.81                         |
| CD27     | 0.76 | 0.76                         |
| TNFRSF17 | 0.73 | 0.86                         |
| LAX1     | 0.75 | 0.76                         |
| CYTIP    | 0.74 | 0.67                         |
| IGK@     | 0.74 | 0.87                         |
| IGJ      | 0.68 | 0.77                         |
| IGHD     | 0.76 | 0.87                         |
| IGLL3P   | 0.67 | 0.77                         |
| IGLL5    | 0.77 | 0.93                         |
| IGHV3-48 | 0.76 | 0.85                         |
| SPCS1    | 0.52 | 0.67                         |
| SLAMF7   | 0.75 | 0.70                         |
| FAM46C   | 0.64 | 0.71                         |
| TXNDC15  | 0.67 | 0.73                         |
| MZB1     | 0.73 | 0.84                         |
| DEF6     | 0.77 | 0.65                         |
